# Supplementary material for: Genome-Wide Association Studies of Mineral Content in Common Bean
Source: Front Plant Sci. 2021 Mar 5;12:636484. doi: 10.3389/fpls.2021.636484 (PMC7982862; doi:10.3389/fpls.2021.636484)
Supplement: Supplementary Table 1 — Common bean accession used in this study. [file Table_1.XLSX]

## Sheet: Gunjaca_TabS1
Accession	Region	County	Location	Latitude	Longitude	Altitude (m a.s.l.)	Habit	Phaseolin type	Cluster membership (K = 3)		Caption	Table S1 Common bean accession used in this study
Ph001	Pannonian	Vukovar-Srijem	Tovarnik	45.16N	19.15E	89	D	III	C		Legend	Habit: I - indeterminate, D - determinate
Ph002	Pannonian	Vukovar-Srijem	Kusać-Soljani	44.95N	18.97E	82	D	III	C			Phaseoline type: I ("S"), II ("H" or "C"), III ("T")
Ph007	Pannonian	Osijek-Baranja	Podravska Moslavina	45.78N	17.98E	100	D	III	C			Cluster membership at K = 3 based on 26 microsatellite loci: A - Mesoamerican origin (phaseolin type I), B - Andean origin (phaseolin type II), C - Andean origin (phaseolin type III), M - Mixed origin (Q < 75%)
Ph008	Pannonian	Osijek-Baranja	Podravska Moslavina	45.78N	17.98E	100	I	I	A
Ph009	Pannonian	Zagreb	Cvetković	45.65N	15.65E	125	D	I	A
Ph010	Pannonian	Zagreb	Cvetković	45.65N	15.65E	125	D	III	C
Ph011	Pannonian	Zagreb	Cvetković	45.65N	15.65E	125	I	I	A
Ph013	Pannonian	Zagreb	Cvetković	45.65N	15.65E	125	I	II	M
Ph014	Pannonian	Zagreb	Cvetković	45.65N	15.65E	125	I	I	A
Ph017	Pannonian	Zagreb	Cvetković	45.65N	15.65E	125	D	III	M
Ph019	Pannonian	Varaždin	Grešćevina	46.23N	16.47E	186	I	I	A
Ph020	Pannonian	Varaždin	Grešćevina	46.23N	16.47E	186	D	III	C
Ph021	Pannonian	Bjelovar-Bilogora	Turčević polje	45.71N	17.33E	200	D	III	C
Ph022	Pannonian	Bjelovar-Bilogora	Turčević polje	45.71N	17.33E	200	I	I	A
Ph023	Pannonian	Zagreb	Cvetković	45.65N	15.65E	125	I	I	A
Ph025	Pannonian	Zagreb	Cvetković	45.65N	15.65E	125	D	II	M
Ph031	Mediterranean	Dubrovnik-Neretva	Mlinište	42.99N	17.62E	10	D	III	C
Ph032	Pannonian	Varaždin	Mali Bukovec	46.29N	16.74E	140	D	I	A
Ph037	Pannonian	Sisak-Moslavina	Staro Pračno	45.49N	16.35E	98	I	I	A
Ph042	Pannonian	Međimurje	Ivanovec	46.37N	16.48E	160	I	I	A
Ph045	Pannonian	Međimurje	Ivanovec	46.37N	16.48E	160	D	III	C
Ph046	Pannonian	Međimurje	Ivanovec	46.37N	16.48E	160	I	I	A
Ph052	Pannonian	Međimurje	Gornji Hrašćan	46.38N	16.34E	172	D	III	C
Ph053	Pannonian	Međimurje	Slakovec	46.41N	16.37E	183	I	I	A
Ph055	Pannonian	Međimurje	Šandorovec	46.33N	16.42E	165	D	III	C
Ph063	Pannonian	Međimurje	Novo Selo Rok	46.43N	16.46E	195	D	III	C
Ph066	Pannonian	Međimurje	Novo Selo Rok	46.43N	16.46E	195	D	III	C
Ph070	Pannonian	Zagreb	Sveti Ivan Zelina	45.96N	16.25E	171	D	III	C
Ph071	Pannonian	Zagreb	Sveti Ivan Zelina	45.96N	16.25E	171	D	III	C
Ph074	Pannonian	Međimurje	Sveti Martin na Muri	46.53N	16.36E	170	D	III	C
Ph079	Pannonian	Međimurje	Dragoslavec	46.45N	16.35E	320	I	II	B
Ph080	Pannonian	Međimurje	Dragoslavec	46.45N	16.35E	320	D	III	C
Ph084	Pannonian	Varaždin	Oštrice	46.19N	16.35E	191	D	III	C
Ph085	Pannonian	Varaždin	Oštrice	46.19N	16.35E	191	D	III	C
Ph088	Pannonian	Varaždin	Presečno	46.09N	16.35E	220	D	III	C
Ph089	Pannonian	Varaždin	Oštrice	46.19N	16.35E	191	I	II	B
Ph092	Pannonian	Varaždin	Oštrice	46.19N	16.35E	191	D	III	C
Ph094	Pannonian	Varaždin	Oštrice	46.19N	16.35E	191	D	III	C
Ph099	Pannonian	Varaždin	Remetinec	46.18N	16.32E	234	D	III	C
Ph106	Pannonian	Krapina-Zagorje	Gredice	46.03N	15.73E	180	I	I	A
Ph107	Pannonian	Krapina-Zagorje	Gredice	46.03N	15.73E	180	I	II	B
Ph110	Pannonian	Krapina-Zagorje	Lučelnica	45.60N	15.92E	130	I	II	B
Ph112	Pannonian	Krapina-Zagorje	Lučelnica	45.60N	15.92E	130	I	II	B
Ph115	Pannonian	Krapina-Zagorje	Lučelnica	45.60N	15.92E	130	I	II	M
Ph116	Pannonian	Krapina-Zagorje	Lučelnica	45.60N	15.92E	130	I	II	B
Ph121	Pannonian	Krapina-Zagorje	Lučelnica	45.60N	15.92E	130	I	II	B
Ph122	Pannonian	Krapina-Zagorje	Lučelnica	45.60N	15.92E	130	I	II	B
Ph124	Pannonian	Krapina-Zagorje	Lučelnica	45.60N	15.92E	130	I	I	A
Ph125	Pannonian	Krapina-Zagorje	Tomaševec	46.03N	15.77E	170	I	II	B
Ph126	Pannonian	Krapina-Zagorje	Dol Klanječki	46.05N	15.75E	231	I	II	B
Ph130	Pannonian	Krapina-Zagorje	Dol Klanječki	46.05N	15.75E	231	I	I	A
Ph134	Pannonian	Krapina-Zagorje	Dol Klanječki	46.05N	15.75E	231	I	II	B
Ph138	Pannonian	Krapina-Zagorje	Tomaševec	46.03N	15.77E	170	I	II	B
Ph139	Pannonian	Krapina-Zagorje	Lučelnica	45.60N	15.92E	130	D	III	C
Ph140	Pannonian	Krapina-Zagorje	Lučelnica	45.60N	15.92E	130	D	III	C
Ph152	Pannonian	Varaždin	Mali Bukovec	46.29N	16.74E	140	I	II	B
Ph156	Pannonian	Krapina-Zagorje	Dol Klanječki	46.05N	15.75E	231	I	I	A
Ph162	Pannonian	Krapina-Zagorje	Dol Klanječki	46.05N	15.75E	231	I	II	B
Ph166	Pannonian	Varaždin	Remetinec	46.18N	16.32E	234	I	I	A
Ph167	Pannonian	Varaždin	Remetinec	46.18N	16.32E	234	I	II	B
Ph169	Pannonian	Varaždin	Visočka	46.17N	16.39E	189	D	III	C
Ph170	Pannonian	Varaždin	Visočka	46.17N	16.39E	189	D	III	C
Ph176	Pannonian	Zagreb	Dubrava	45.84N	16.54E	140	D	III	C
Ph180	Pannonian	Zagreb	Dubrava	45.84N	16.54E	140	D	III	C
Ph184	Pannonian	Zagreb	Dubrava	45.84N	16.54E	140	I	II	A
Ph185	Pannonian	Međimurje	Totovec	46.34N	16.44E	163	I	III	M
Ph189	Pannonian	Međimurje	Totovec	46.34N	16.44E	163	I	II	M
Ph190	Pannonian	Međimurje	Totovec	46.34N	16.44E	163	I	II	B
Ph191	Pannonian	Međimurje	Totovec	46.34N	16.44E	163	I	I	A
Ph192	Pannonian	Varaždin	Leštakovec	46.25N	16.45E	180	I	I	A
Ph195	Pannonian	Varaždin	Leštakovec	46.25N	16.45E	180	D	III	C
Ph196	Pannonian	Osijek-Baranja	Tvrđavica	45.57N	18.68E	87	D	III	C
Ph197	Pannonian	Osijek-Baranja	Bijelo brdo	45.52N	18.87E	94	D	III	C
Ph198	Pannonian	Osijek-Baranja	Ivanovac	45.49N	18.64E	85	D	III	C
Ph200	Pannonian	Osijek-Baranja	Lug	45.66N	18.77E	90	D	III	C
Ph203	Pannonian	Krapina-Zagorje	Lučelnica	45.60N	15.92E	130	D	III	C
Ph205	Pannonian	Osijek-Baranja	Ernestinovo	45.45N	18.66E	85	D	I	A
Ph206	Pannonian	Osijek-Baranja	Ernestinovo	45.45N	18.66E	85	D	III	C
Ph207	Mountainous	Primorje-Gorski Kotar	Delnice	45.40N	14.80E	706	I	III	C
Ph208	Mountainous	Primorje-Gorski Kotar	Delnice	45.40N	14.80E	706	I	III	B
Ph209	Mountainous	Primorje-Gorski Kotar	Delnice	45.40N	14.80E	706	D	III	C
Ph211	Mountainous	Primorje-Gorski Kotar	Lokve	45.36N	14.75E	726	D	III	C
Ph215	Pannonian	Bjelovar-Bilogora	Plošćica	45.73N	16.92E	130	I	I	A
Ph216	Pannonian	Bjelovar-Bilogora	Plošćica	45.73N	16.92E	130	D	III	C
Ph220	Mountainous	Primorje-Gorski Kotar	Prezid	45.64N	14.58E	770	D	I	C
Ph222	Mountainous	Primorje-Gorski Kotar	Prezid	45.64N	14.58E	770	D	III	C
Ph223	Mountainous	Primorje-Gorski Kotar	Prezid	45.64N	14.58E	770	D	III	C
Ph224	Mountainous	Primorje-Gorski Kotar	Prezid	45.64N	14.58E	770	I	II	B
Ph230	Pannonian	Karlovac	Orlovac	45.53N	15.56E	110	D	III	C
Ph232	Pannonian	Karlovac	Orlovac	45.53N	15.56E	110	D	III	C
Ph233	Pannonian	Varaždin	Veliki Bukovec	46.29N	16.71E	141	I	II	B
Ph235	Pannonian	Varaždin	Veliki Bukovec	46.29N	16.71E	141	I	I	A
Ph236	Pannonian	Koprivnica-Križevci	Gregurovec	46.16N	15.98E	230	D	III	B
Ph237	Pannonian	Koprivnica-Križevci	Erdovec	46.03N	16.48E	174	D	I	A
Ph239	Pannonian	Zagreb	Rakitovec	45.66N	16.14E	101	D	III	C
Ph240	Pannonian	Zagreb	Rakitovec	45.66N	16.14E	101	D	III	C
Ph241	Pannonian	Zagreb	Rakitovec	45.66N	16.14E	101	I	II	B
Ph243	Pannonian	Koprivnica-Križevci	Gračina	45.98N	16.56E	160	D	III	C
Ph245	Pannonian	Koprivnica-Križevci	Gračina	45.98N	16.56E	160	I	II	B
Ph246	Pannonian	Koprivnica-Križevci	Gračina	45.98N	16.56E	160	I	I	A
Ph247	Pannonian	Koprivnica-Križevci	Gračina	45.98N	16.56E	160	I	I	A
Ph248	Pannonian	Koprivnica-Križevci	Gračina	45.98N	16.56E	160	D	III	C
Ph249	Pannonian	Koprivnica-Križevci	Gračina	45.98N	16.56E	160	D	III	M
Ph253	Pannonian	Koprivnica-Križevci	Kloštar Podravski	45.98N	17.16E	118	D	III	C
Ph255	Pannonian	Koprivnica-Križevci	Kloštar Podravski	45.98N	17.16E	118	D	II	M
Ph259	Pannonian	Zagreb	Brčevec	45.87N	16.41E	110	D	III	C
Ph263	Pannonian	Međimurje	Podturen	46.47N	16.55E	155	D	I	A
Ph265	Pannonian	Međimurje	Sveta Marija	46.33N	16.74E	140	I	I	A
Ph266	Pannonian	Međimurje	Podturen	46.47N	16.55E	155	D	II	C
Ph268	Pannonian	Međimurje	Podturen	46.47N	16.55E	155	I	I	A
Ph271	Pannonian	Koprivnica-Križevci	Koprivnica	46.16N	16.83E	135	I	I	A
Ph278	Pannonian	Koprivnica-Križevci	Peteranec	46.19N	16.89E	130	I	I	A
Ph280	Pannonian	Krapina-Zagorje	Ladislavec	46.11N	16.06E	200	D	III	C
Ph282	Pannonian	Krapina-Zagorje	Ladislavec	46.11N	16.06E	200	D	III	M
Ph287	Pannonian	Koprivnica-Križevci	Zamladinec	46.08N	16.49E	160	D	III	C
Ph288	Pannonian	Koprivnica-Križevci	Podgajec	46.03N	16.49E	190	I	I	A
Ph289	Pannonian	Koprivnica-Križevci	Koprivnica	46.16N	16.83E	135	D	II	C
Ph293	Pannonian	Koprivnica-Križevci	Selanec	46.08N	16.48E	175	D	I	C
Ph294	Pannonian	Koprivnica-Križevci	Selanec	46.08N	16.48E	175	D	III	C
Ph295	Pannonian	Koprivnica-Križevci	Selanec	46.08N	16.48E	175	I	II	B
Ph298	Pannonian	Koprivnica-Križevci	Poljana Križevačka	45.97N	16.54E	130	D	III	C
Ph299	Pannonian	Koprivnica-Križevci	Dijankovec	46.04N	16.48E	174	I	II	B
Ph300	Pannonian	Koprivnica-Križevci	Dijankovec	46.04N	16.48E	174	I	II	M
Ph302	Pannonian	Koprivnica-Križevci	Dijankovec	46.04N	16.48E	174	I	I	A
Ph303	Pannonian	Bjelovar-Bilogora	Bjelovar	45.90N	16.84E	132	D	III	C
Ph304	Pannonian	Bjelovar-Bilogora	Bjelovar	45.90N	16.84E	132	D	III	C
Ph305	Pannonian	Koprivnica-Križevci	Gornji Dubovec	46.01N	16.44E	136	I	I	A
Ph306	Pannonian	Koprivnica-Križevci	Gornji Dubovec	46.01N	16.44E	136	D	III	C
Ph307	Pannonian	Koprivnica-Križevci	Gornji Dubovec	46.01N	16.44E	136	D	I	A
Ph308	Pannonian	Koprivnica-Križevci	Gornji Dubovec	46.01N	16.44E	136	D	III	C
Ph310	Pannonian	Koprivnica-Križevci	Greberanec	45.92N	16.37E	175	D	III	C
Ph312	Pannonian	Koprivnica-Križevci	Greberanec	45.92N	16.37E	175	D	III	C
Ph314	Pannonian	Koprivnica-Križevci	Dijankovec	46.04N	16.48E	174	D	III	C
Ph315	Pannonian	Koprivnica-Križevci	Dijankovec	46.04N	16.48E	174	D	III	C
Ph317	Pannonian	Koprivnica-Križevci	Podgajec	46.03N	16.49E	190	D	III	M
Ph318	Pannonian	Koprivnica-Križevci	Kloštar	46.01N	17.21E	110	I	I	A
Ph319	Pannonian	Koprivnica-Križevci	Podgajec	46.03N	16.49E	190	I	I	A
Ph320	Pannonian	Koprivnica-Križevci	Zamladinec	46.08N	16.49E	160	D	I	A
Ph331	Pannonian	Koprivnica-Križevci	Torčec	46.22N	16.89E	128	I	III	C
Ph334	Pannonian	Vukovar-Srijem	Stari Mikanovci	45.28N	18.56E	91	D	III	C
Ph335	Pannonian	Međimurje	Donji Pustakovec	46.38N	16.60E	150	D	II	M
Ph337	Pannonian	Krapina-Zagorje	Marinci	46.13N	15.73E	174	I	II	M
Ph339	Pannonian	Međimurje	Ivanovec	46.37N	16.48E	160	I	I	A
Ph343	Pannonian	Karlovac	Vojnić	45.33N	15.70E	140	D	III	C
Ph344	Mountainous	Lika-Senj	Brinje	45.00N	15.13E	471	D	III	C
Ph345	Mountainous	Lika-Senj	Brinje	45.00N	15.13E	471	I	I	A
Ph346	Mountainous	Lika-Senj	Brinje	45.00N	15.13E	471	D	III	C
Ph351	Mountainous	Lika-Senj	Brinje	45.00N	15.13E	471	D	III	C
Ph352	Pannonian	Virovitica-Podravina	Virovitica	45.83N	17.39E	120	I	I	A
Ph357	Pannonian	Sisak-Moslavina	Šatornja	45.34N	16.01E	150	D	III	C
Ph358	Mountainous	Karlovac	Ogulin	45.27N	15.22E	320	I	III	M
Ph361	Mediterranean	Zadar	Škabrnja	44.09N	15.45E	105	D	III	C
Ph362	Mediterranean	Zadar	Lišane ostrovičke	43.97N	15.76E	133	D	III	C
Ph363	Pannonian	Virovitica-Podravina	Virovitica	45.83N	17.39E	120	D	III	C
Ph365	Pannonian	Bjelovar-Bilogora	Plošćica	45.73N	16.92E	130	D	III	C
Ph366	Pannonian	Bjelovar-Bilogora	Plošćica	45.73N	16.92E	130	I	I	A
Ph370	Mountainous	Lika-Senj	Gospić	44.55N	15.37E	561	I	II	M
Ph371	Mountainous	Lika-Senj	Gospić	44.55N	15.37E	561	D	III	C
Ph378	Pannonian	Krapina-Zagorje	Brezakovec	46.10N	15.65E	263	I	I	A
Ph384	Mediterranean	Šibenik-Knin	Piramatovci	43.91N	15.83E	180	D	III	C
Ph386	Mediterranean	Šibenik-Knin	Piramatovci	43.91N	15.83E	180	I	I	A
Ph387	Pannonian	Virovitica-Podravina	Pitomača	45.95N	17.23E	116	I	I	A
Ph388	Pannonian	Virovitica-Podravina	Pitomača	45.95N	17.23E	116	I	II	B
Ph389	Pannonian	Virovitica-Podravina	Pitomača	45.95N	17.23E	116	I	III	C
Ph390	Pannonian	Virovitica-Podravina	Pitomača	45.95N	17.23E	116	I	II	M
Ph392	Pannonian	Koprivnica-Križevci	Severovci	46.07N	17.11E	114	I	II	B
Ph393	Pannonian	Koprivnica-Križevci	Severovci	46.07N	17.11E	114	I	II	B
Ph394	Pannonian	Koprivnica-Križevci	Severovci	46.07N	17.11E	114	I	II	B
Ph395	Pannonian	Virovitica-Podravina	Pitomača	45.95N	17.23E	116	D	III	C
Ph400	Pannonian	Koprivnica-Križevci	Ferdinandovac	46.06N	17.19E	111	I	II	B
Ph406	Pannonian	Koprivnica-Križevci	Podravske Sesvete	46.00N	17.21E	110	I	I	M
Ph409	Pannonian	Brod-Posavina	Davor	45.11N	17.51E	90	I	I	A
Ph411	Pannonian	Požega-Slavonia	Sesvete	45.34N	17.83E	170	I	I	A
Ph413	Pannonian	Požega-Slavonia	Sesvete	45.34N	17.83E	170	I	I	A
